# Supplementary material for: Dysfunctional DNA repair pathway via defective FANCD2 gene engenders multifarious exomic and transcriptomic effects in Fanconi anemia
Source: PubMed Central journal article supplement (PMC6305641; doi:10.1002/mgg3.502), 2018-11-18

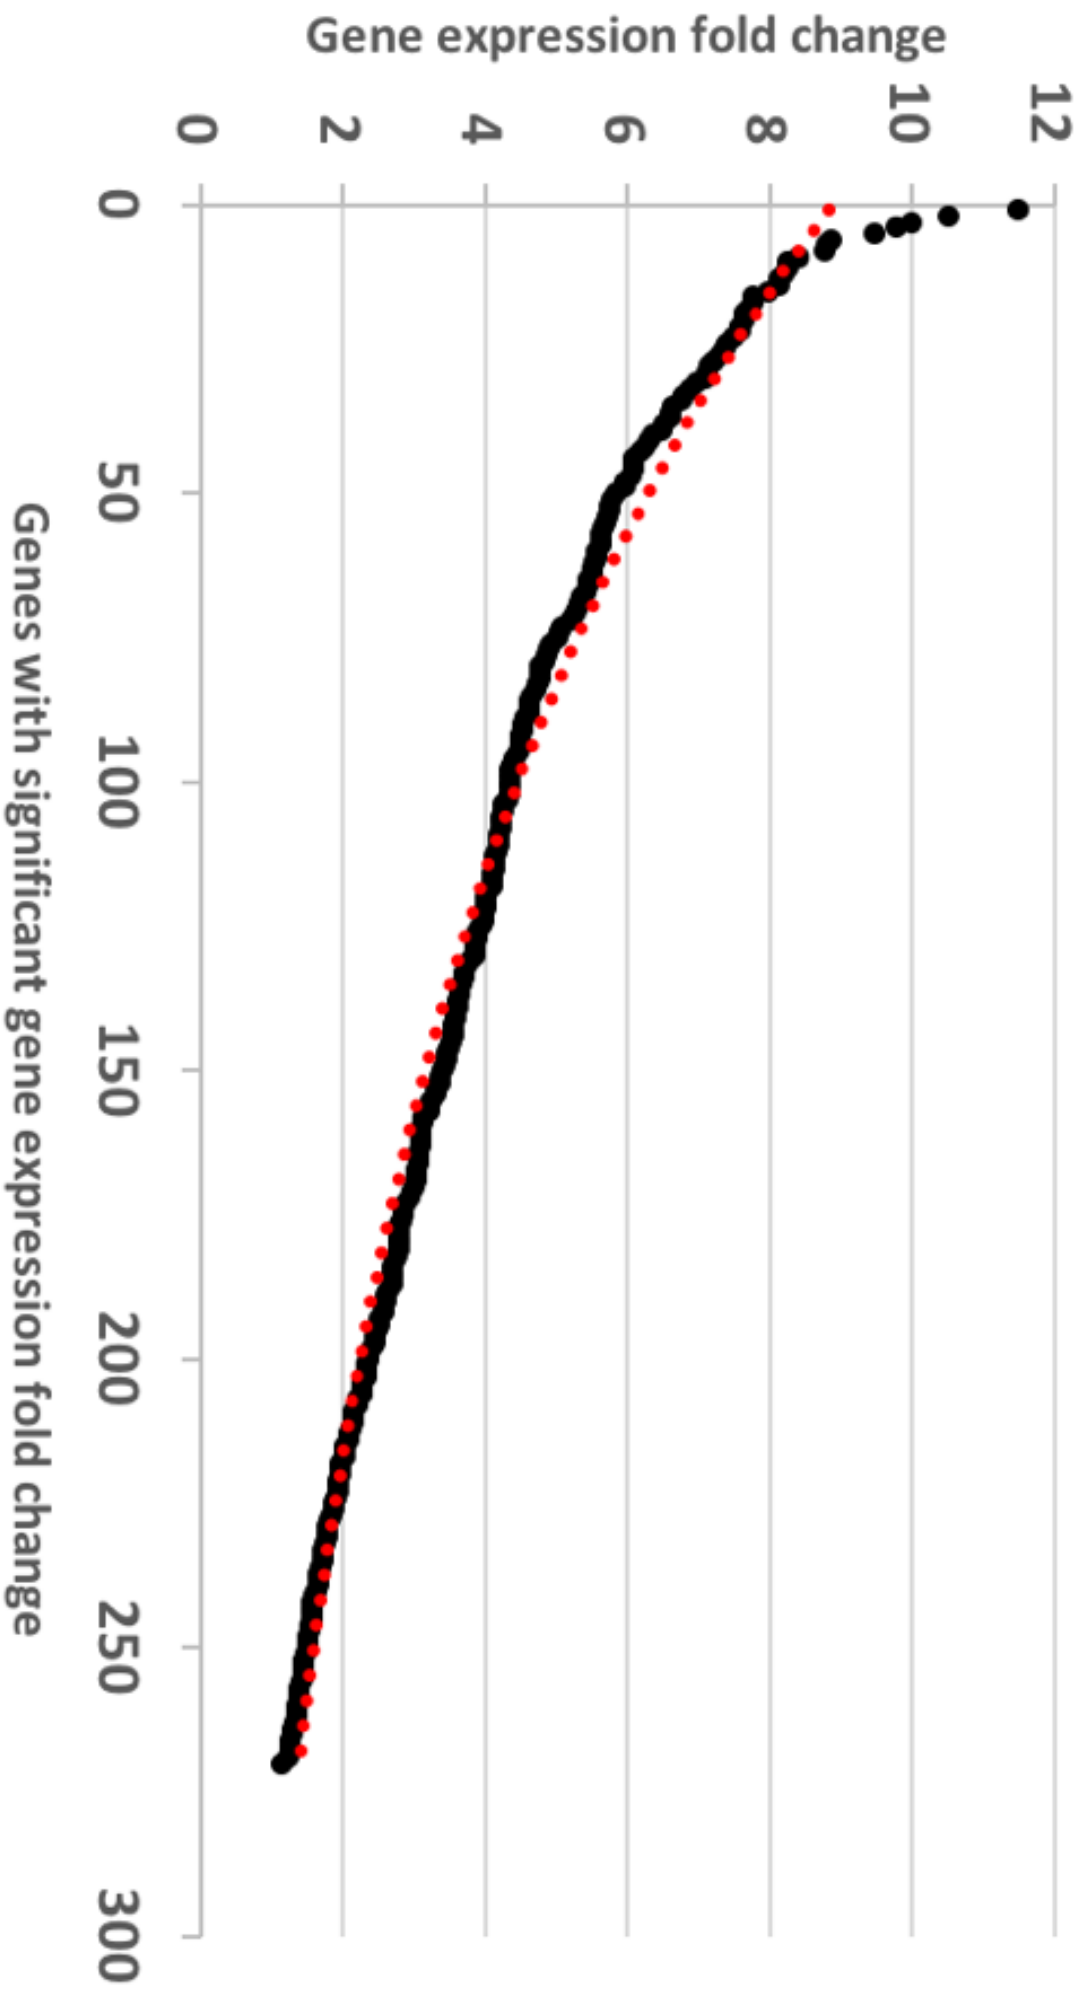

Supplement: MGG3-6-1199-s001.pdf [file MGG3-6-1199-s001.pdf]
